# Supplementary material
Source: PubMed Central journal article supplement (PMC3346441)
Supplement: supp_78.9.3325_AEM-AEM07790-11-s01.pdf [file supp_78.9.3325_AEM-AEM07790-11-s01.pdf]

## SUPPLEMENTARY MATERIAL

**Table S1:** Oligonucleotides used in this study

| Oligonucleotides                                                                                        | Sequence (5' → 3') and properties <sup>a</sup>                    |
|---------------------------------------------------------------------------------------------------------|-------------------------------------------------------------------|
| <b>DNA-Sequencing</b>                                                                                   |                                                                   |
| M13-for                                                                                                 | CGCCAGGGTTTTCCCAGTCAC                                             |
| M13-rev                                                                                                 | AGCGGATAACAATTTACACAGGA                                           |
| pAN6-for                                                                                                | GCTCGTATAATGTGTGGAATTGTG                                          |
| pAN6-rev                                                                                                | CTCATCCGCCAAAACAGCCAAG                                            |
| <b>Deletion of <i>ldhA</i></b>                                                                          |                                                                   |
| Δ <i>ldhA</i> 1-for                                                                                     | TATA <u>AAGCTT</u> CTTGTA <del>AAACAGCCAGGTTAGCAG</del> (HindIII) |
| Δ <i>ldhA</i> 2-rev                                                                                     | <del>CCCATCCACTAAACTTAAACAACCGACGGTTTCTTTCATTTTCG</del>           |
| Δ <i>ldhA</i> 3-for                                                                                     | <del>TGTTTAAGTTTAGTGGATGGGGCAAATACCCTGCGCGAAATTCAG</del>          |
| Δ <i>ldhA</i> 4-rev                                                                                     | TATAGA <u>ATTC</u> CATGATGCAGGATGGAGTATCCG (EcoRI)                |
| Δ <i>ldhA</i> -out-for                                                                                  | GCACCAGTTGCGATGTGGGTGG                                            |
| Δ <i>ldhA</i> -out-rev                                                                                  | CGTTGTCGATCATCTGCTTCCAG                                           |
| <b>Deletion of <i>cat</i></b>                                                                           |                                                                   |
| Δ <i>cat</i> -out-for                                                                                   | CGTCGTAAAGCGGAGTTTTAGG                                            |
| Δ <i>cat</i> -out-rev                                                                                   | CGGCACAGCGTGCGGAAAGC                                              |
| <b>Deletion of <i>pqo</i></b>                                                                           |                                                                   |
| Δ <i>pqo</i> -out-for                                                                                   | GAGTTGTCTACACCGATCAGAAAG                                          |
| Δ <i>pqo</i> -out-rev                                                                                   | GCATACCTGCTGCCAGCGCC                                              |
| <b>Deletion of <i>pta-ack</i></b>                                                                       |                                                                   |
| Δ <i>pta-ack</i> -out-for                                                                               | CTGCTCCTTGTCATCACATTGTGC                                          |
| Δ <i>pta-ack</i> -out-rev                                                                               | GCAGGCCTCAGCTGGCTTCGAG                                            |
| <b>Chromosomal integration of <math>P_{uvr-pyc}^{P458S}</math> construct in <i>Apta-ackA</i> region</b> |                                                                   |

|                    |                                                                                                                       |
|--------------------|-----------------------------------------------------------------------------------------------------------------------|
| mΔpta-ack1-for     | TATA <u>AAGCTT</u> CCATAACGGATCAAACCGAAAGGC (HindIII)                                                                 |
| mΔpta-ack2-rev     | <u>CCTGCAGG</u> ACATCGCCTTTCTAATTTTCAGCCTG (SbfI)                                                                     |
| mΔpta-ack-Ptuf-for | <i>GAAAGGCGATGT</i> <u>CCTGCAGG</u> CCACAGGGTAGCTGGTAGTTTG (SbfI)                                                     |
| GTG-Ptuf-rev       | CACTGTATGTCCTCCTGGACTTC                                                                                               |
| Ptuf-ptyc-for      | <i>GAAGTCCAGGAGGACATACAGTGT</i> CGACTCACACATCTTCAACG<br><i>GGATCCTAACCAGGAGAG</i> <u>CATATG</u> TTAGGAAACGACGACGATCAA |
| ptyc-mΔpta-ack-rev | GTC (NdeI)                                                                                                            |
| mΔpta-ack3-for     | <u>CATATG</u> CTCTCCTGGTTAGGATCCACCAC (NdeI)                                                                          |
| mΔpta-ack4-rev     | TATA <u>TCTAGAG</u> CTTCCGCCTCCGCGAACCC (XbaI)                                                                        |
| mΔpta-seq-for      | CGCTCCGTATTGTTTTCTACGG                                                                                                |
| mΔack-seq-rev      | GAGGTCTAGGGGCCAACAAGC                                                                                                 |
| ptyc-seq1-for      | GGCATTACTTTTATTGGCCCAACC                                                                                              |
| ptyc-seq2-for      | GGAACCGTGGAATTCTTGGTTCG                                                                                               |
| ptyc-seq3-for      | CCCGCACCTCCTTCAGGCTC                                                                                                  |
| ptyc-seq4-for      | CGCGGCCGCAACACCGTGG                                                                                                   |
| ptyc-seq5-for      | CGCACACCCGTCGCGATAACC                                                                                                 |
| ptyc-seq6-for      | GACGCTGATGATTCCAAGGAACG                                                                                               |
| ptyc-seq12-rev     | GGTGGATTCCGCCAAAACCTGGC                                                                                               |
| ptyc-seq7-for      | CCATGTTGCTGCACCATTCGC                                                                                                 |

---

**Chromosomal integration of  $P_{ur}fdh$  construct in  $\Delta pqo$  region**

|                   |                                                               |
|-------------------|---------------------------------------------------------------|
| Δpqo1-for         | TATA <u>AAGCTT</u> CAACGTTGGGTTTTTCGTAGGCG (HindIII)          |
| Δpqo2-XbaI-BamHI- | <u>GGATCCGAGCTCGGTA</u> <u>CTCTAGACT</u> GCGTAGCTGTGTGCCATCTG |
| rev               | (BamHI & XbaI)                                                |
| XbaI-BamHI Δpqo3- | <u>TCTAGAGTACCGAGCTCGGATCC</u> GCCCGTTCGAACATAAGGAATAT        |
| for               | TC (XbaI & BamHI)                                             |
| Δpqo4-rev         | TATAGAATTCGCCGTGACTCCACTTCTACGATG (EcoRI)                     |
| Δpqo-out2-for     | CCGAACCCACCAGAAGAATTCC                                        |

|                           |                                                      |
|---------------------------|------------------------------------------------------|
| $\Delta$ pqo-out2-rev     | GTACGGAAAGTGCCATCGGCTTC                              |
| Ptuf-for                  | TATAT <u>CTAGACC</u> CACAGGGTAGCTGGTAGTTTG (XbaI)    |
| Ptuf-rev                  | TGTATGTCCTCCTGGACTTCGTG                              |
| Ptuf-fdh-for              | <i>CACGAAGTCCAGGAGGACATACAATGGCAAAGGTCCTGTGCGTTC</i> |
| fdh-rev                   | TATAG <u>GATCCT</u> CAGACCGCCTTCTTGAAGTTGG (BamHI)   |
| $\Delta$ pqo-fdh-seq1-for | GTCGCACCAAGTTAGGCAACAC                               |
| $\Delta$ pqo-fdh-seq3-rev | CAGCAGGTGTATCAATCATCATGG                             |
| fdh-seq-rev               | GCGTCTCGTCATTGATCATGTGC                              |

---

**Construction of pEKEx2-*fdh***

|                  |                                                                       |
|------------------|-----------------------------------------------------------------------|
| fdh-PstI-RBS-for | ATGC <u>CTGCAGGAAGG</u> GAGATATAGATATGGCAAAGGTCCTGTGCG<br>TTCT (PstI) |
| fdh-BamHI-rev    | TATAG <u>GATCCT</u> CAGACCGCCTTCTTGAAGTTGG (BamHI)                    |

---

**Construction of pAN6-*gap***

|             |                                                      |
|-------------|------------------------------------------------------|
| gap-for     | TATAC <u>CATATGAT</u> GACCATTCGTGTTGGTATTAACG (NdeI) |
| gap-rev     | TATAG <u>GCTAGCTT</u> AGAGCTTGGAAAGCTACGAGCTC (NheI) |
| gap-seq-for | CGGCTAAGGCTCACATCGAAGC                               |

---

<sup>a</sup> In some cases oligonucleotides were designed to introduce recognition sites for restriction endonucleases (recognition sites underlined, restriction endonucleases indicated in parentheses), ribosomal binding sites (printed in bold), and complementary sequences for generating overlap-extension PCR products (printed in italics) into the resulting PCR products.
